# Supplementary material for: Metabolic synthetic lethality by targeting NOP56 and mTOR in KRAS-mutant lung cancer
Source: Springer Nature journal article supplement (doi:10.1186/s13046-022-02240-5), 2022-01-17
Supplement: MOESM1 [file 20041474]

## Supplementary Information

### **Metabolic synthetic lethality by targeting NOP56 and mTOR signaling in *KRAS*-mutant lung cancer**

Zhang Yang<sup>1¶</sup>, Shun-Qing Liang<sup>1¶#</sup>, Liang Zhao<sup>1</sup>, Haitang Yang<sup>1§</sup>, Thomas M. Marti<sup>1</sup>, Balazs Hegedüs<sup>2</sup>, Yanyun Gao<sup>1</sup>, Bin Zheng<sup>3</sup>, Chun Chen<sup>3</sup>, Wenxiang Wang<sup>4</sup>, Patrick Dorn<sup>1</sup>, Gregor J. Kocher<sup>1</sup>, Ralph A. Schmid<sup>1\*</sup>, Ren-Wang Peng<sup>1\*</sup>

#### **This PDF files include:**

1. Supplementary Figures S1-S5

2. Supplementary Tables

Table S1. Cell lines used in this study

Table S2. Inhibitors used for synthetic lethal chemical screens

Table S3. Antibodies used in this study

Table S4. *KRAS* synthetic lethal (SL) genes

**A**

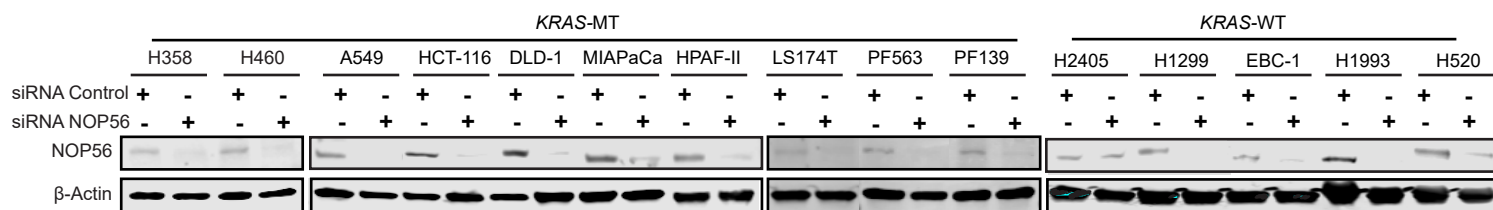

**B**

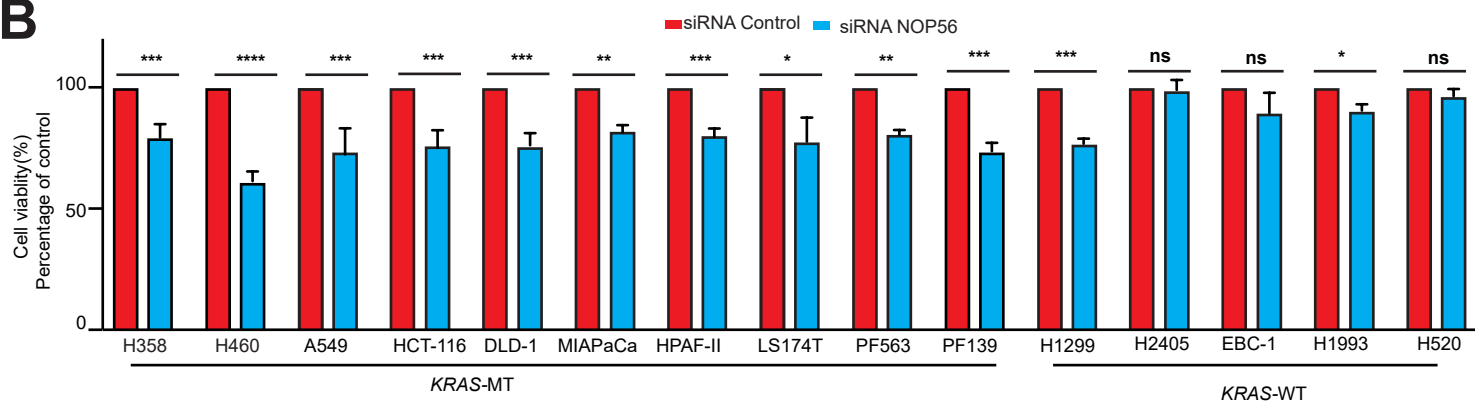

**C**

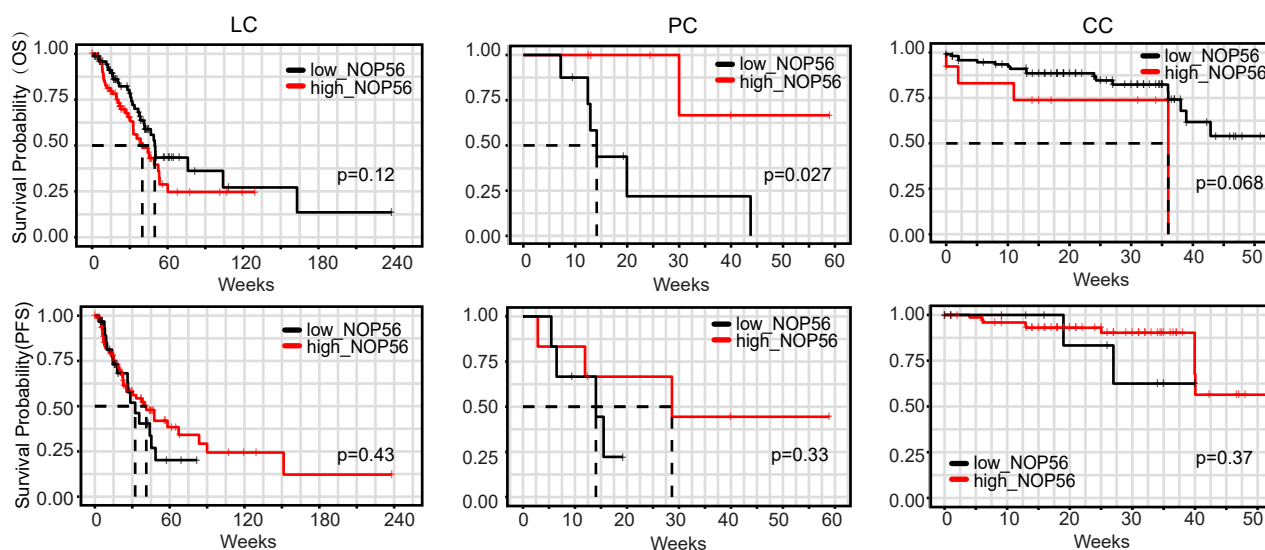

**D**

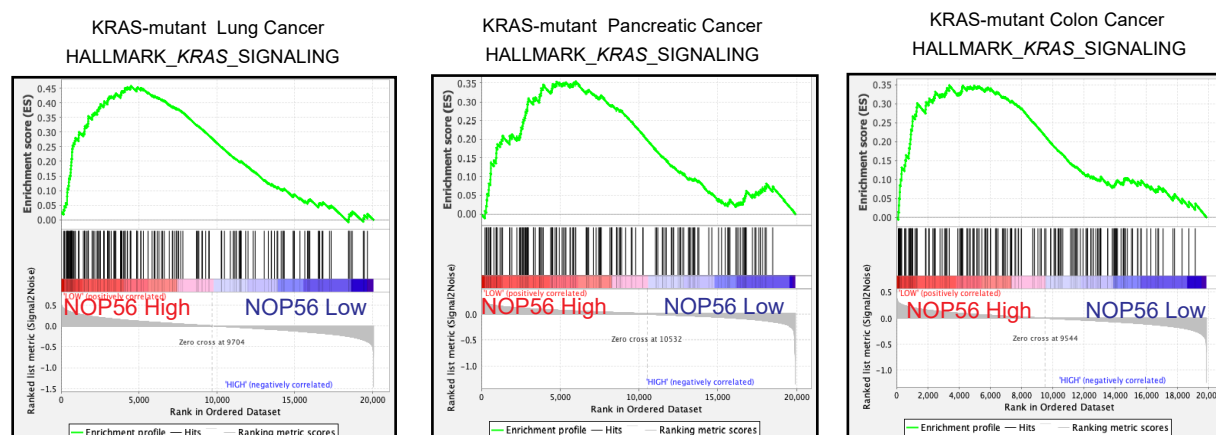

**Figure S1: NOP56 knockdown inhibits proliferation of *KRAS*-mutant cancer cells.**

**A**, Immunoblots of *KRAS*-mutant and *KRAS*-wild type cancer cells that were transfected with *NOP56*-specific siRNAs (si-*NOP56*) or scramble control siRNAs (si-Control).

**B**, *KRAS* mutant and *KRAS* wild type cancer cells were transfected with control siRNAs or *NOP56*-specific siRNAs. Cell viability was determined 72 hours post transfection. Data are presented as mean  $\pm$  SD (n=3). \* $p < 0.05$ , \*\* $p < 0.01$ , \*\*\* $P < 0.001$ , \*\*\*\* $P < 0.0001$  and ns  $P > 0.05$  by two-way ANOVA with Tukey's multiple comparisons test.

**C**, *NOP56* is not a biomarker of survival in patients with *KRAS*-wild-type lung adenocarcinoma (LC), pancreatic cancer (PC) and colon cancer (CC). Kaplan–Meier survival analyses of patient cohorts in TCGA were stratified by the optimal cut-off value of the mRNA level of *NOP56*.

**D**, Gene set enrichment analysis (GSEA) of a TCGA cohort of patients with *KRAS*-mutant lung (n=141), pancreatic (n=133) and colon cancer (n=170).

Figure S2

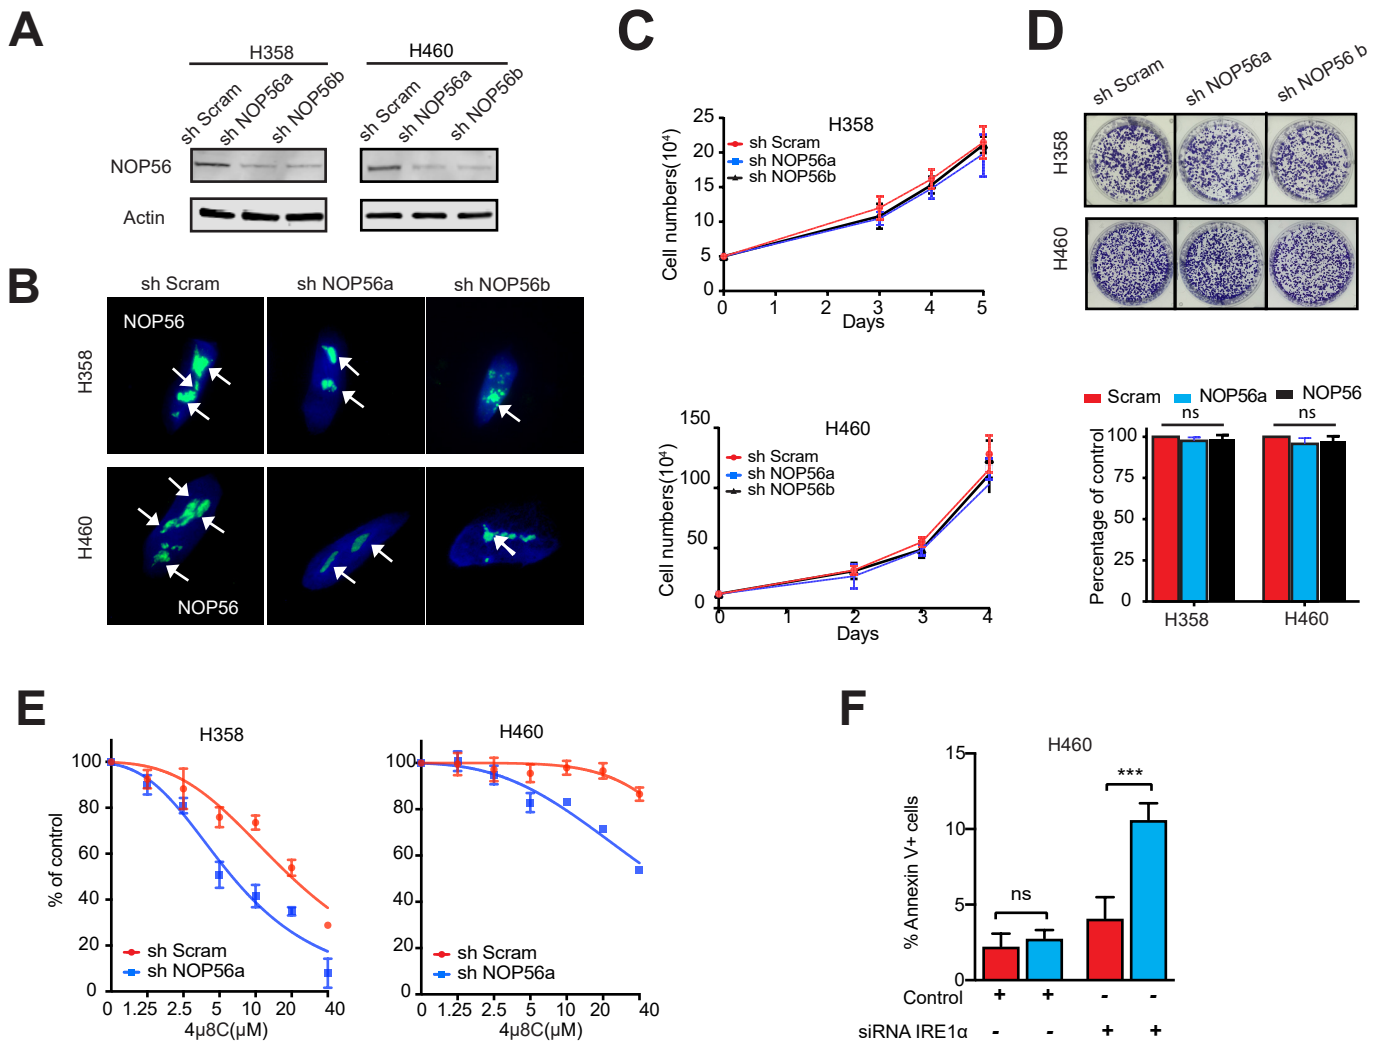

**Figure S2: Stable expression of *NOP56*-specific shRNAs activates IRE1 $\alpha$ -mediated UPR**

**A**, Immunoblots of H358 and H460 cells expressing scrambled control or *NOP56* shRNAs.

**B**, Immunofluorescence of H358 and H460 cells that express scrambled control or *NOP56* shRNAs. The *NOP56* signal is indicated by arrowheads.

**C**, The cell viability curve of H358 and H460 cells expressing scramble control shRNA or the *NOP56*-targeted shRNAs was measured at the indicated time points.

**D**, Clongenic assay of H358 and H460 cells expressing scramble control or *NOP56*-targeted shRNAs. Quantification of clongenic assay were shown underneath. Data are presented as mean  $\pm$  SD (n=3).

**E**, Growth inhibition of H358 and H460 cells expressing control shRNA or *NOP56*-targeted shRNA (3000 cells/well) treated for 72h with the indicated doses of an IRE1 $\alpha$  inhibitor (4 $\mu$ 8C). Data are presented as mean  $\pm$  SD (n=3).

**F**, Apoptosis assay of H460 cells expressing scrambled control or *NOP56*-targeted shRNAs after transfection with *IRE1 $\alpha$* -specific or control siRNAs for 72 h. Data are presented as mean  $\pm$  SD (n=3). \*\*\* $P$ <0.001 and ns  $P$ > 0.05 by two-way ANOVA with Tukey's multiple comparisons test.

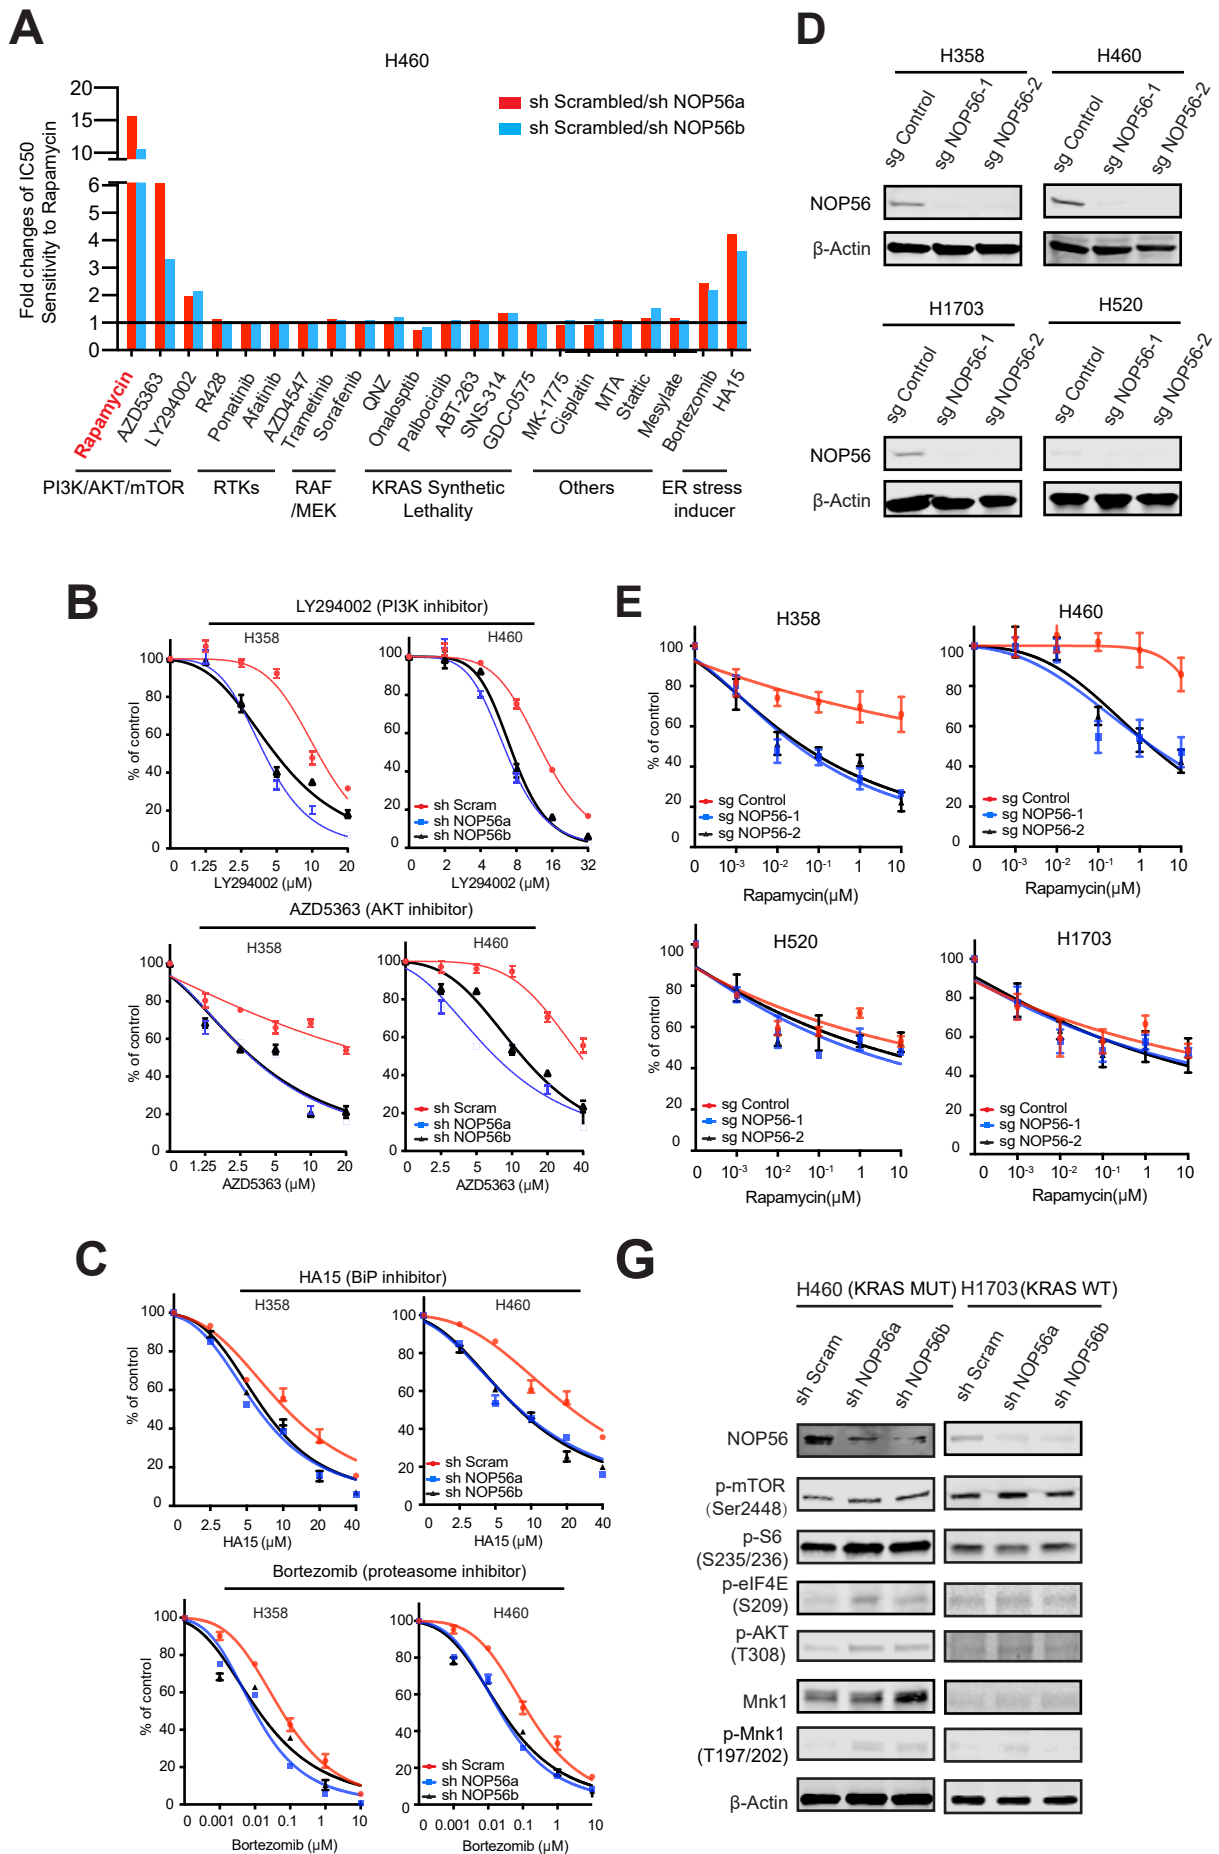

F

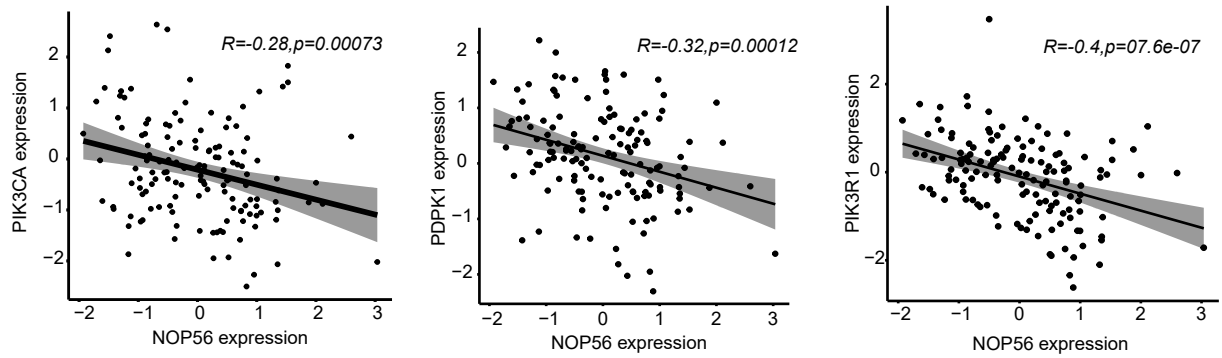

H

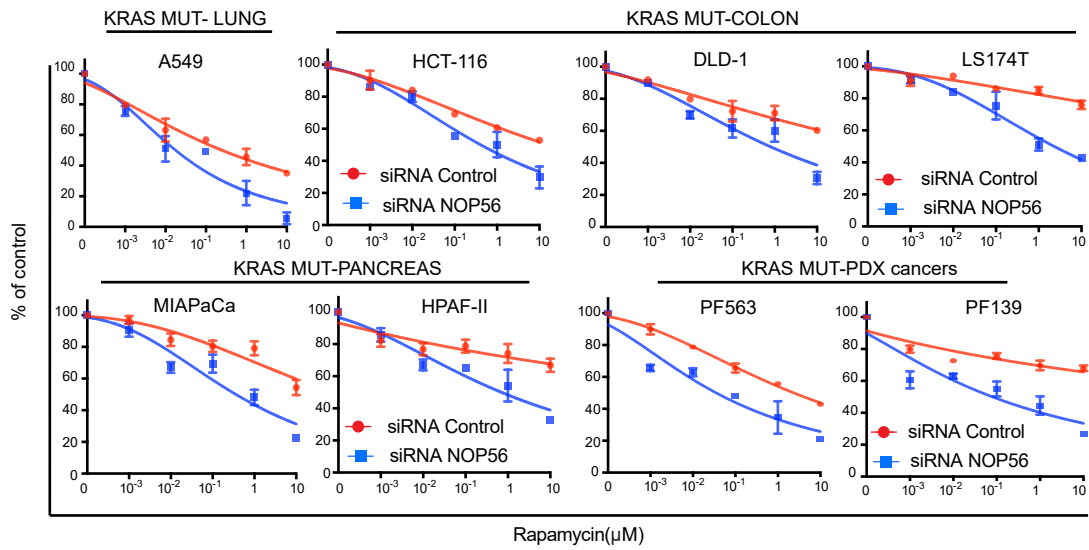

I

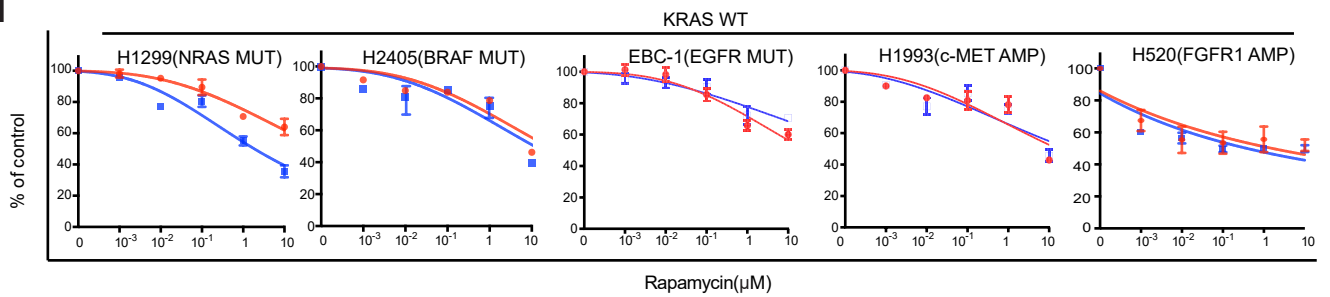

**Figure S3: NOP56 KD renders *KRAS*-mutant lung cancer cells susceptible to mTOR inhibition.**

**A,** Bar graphs illustrating the change of sensitivity to different inhibitors in H460 cells after *NOP56* knockdown. Data are presented as IC<sub>50</sub> values of the indicated inhibitors in H460 cells expressing scramble control shRNAs compared to IC<sub>50</sub> in H460 cells expressing *NOP56*-targeted shRNAs. Data are shown as mean (n=2).

**B,** Viability assay of H460 and H358 cells expressing control shRNA or *NOP56*-targeted shRNA (3000 cells/well) after treated for 72 h with the indicated doses of PI3K inhibitor (LY294002) and AKT inhibitor (AZD5363). Data are presented as mean ± SD (n=3).

**C,** Viability assay of H460 and H358 cells expressing control shRNA or *NOP56*-targeted shRNA (3000 cells/well) after treated for 72 h with the indicated doses of BiP inhibitor (HA15) and ER stress inducer (bortezomib). Data are presented as mean ± SD (n=3).

**D,** Immunoblots of *KRAS*-mutant (H358, H460) and wild-type (H1703, H520) cells expressing *NOP56*-specific sgRNAs.

**E,** Viability assay of the cells expressing control or *NOP56*-specific sgRNAs after treated with rapamycin for 72 h. Data are shown as mean ± SD (n=3).

**F,** *NOP56* is negatively correlated with PI3K/AKT/mTOR pathway genes (*PI3KCA*, *PDPK1*, *PIK3R1*) in *KRAS*-mutant lung cancer patients. Pearson and Spearman coefficient and significance (p-value) are analyzed using R software (Cor.test function).

**G,** Immunoblots of H460 and H1703 cells expressing control or *NOP56*-targeted shRNAs.

**H, I,** Viability assay of *KRAS*-mutant (**H**) and wildtype (**I**) cancer cells expressing control or *NOP56*-specific siRNAs after treated with rapamycin. The assay was performed 72 h after drug treatment (96h after siRNA transfection).



Figure S4

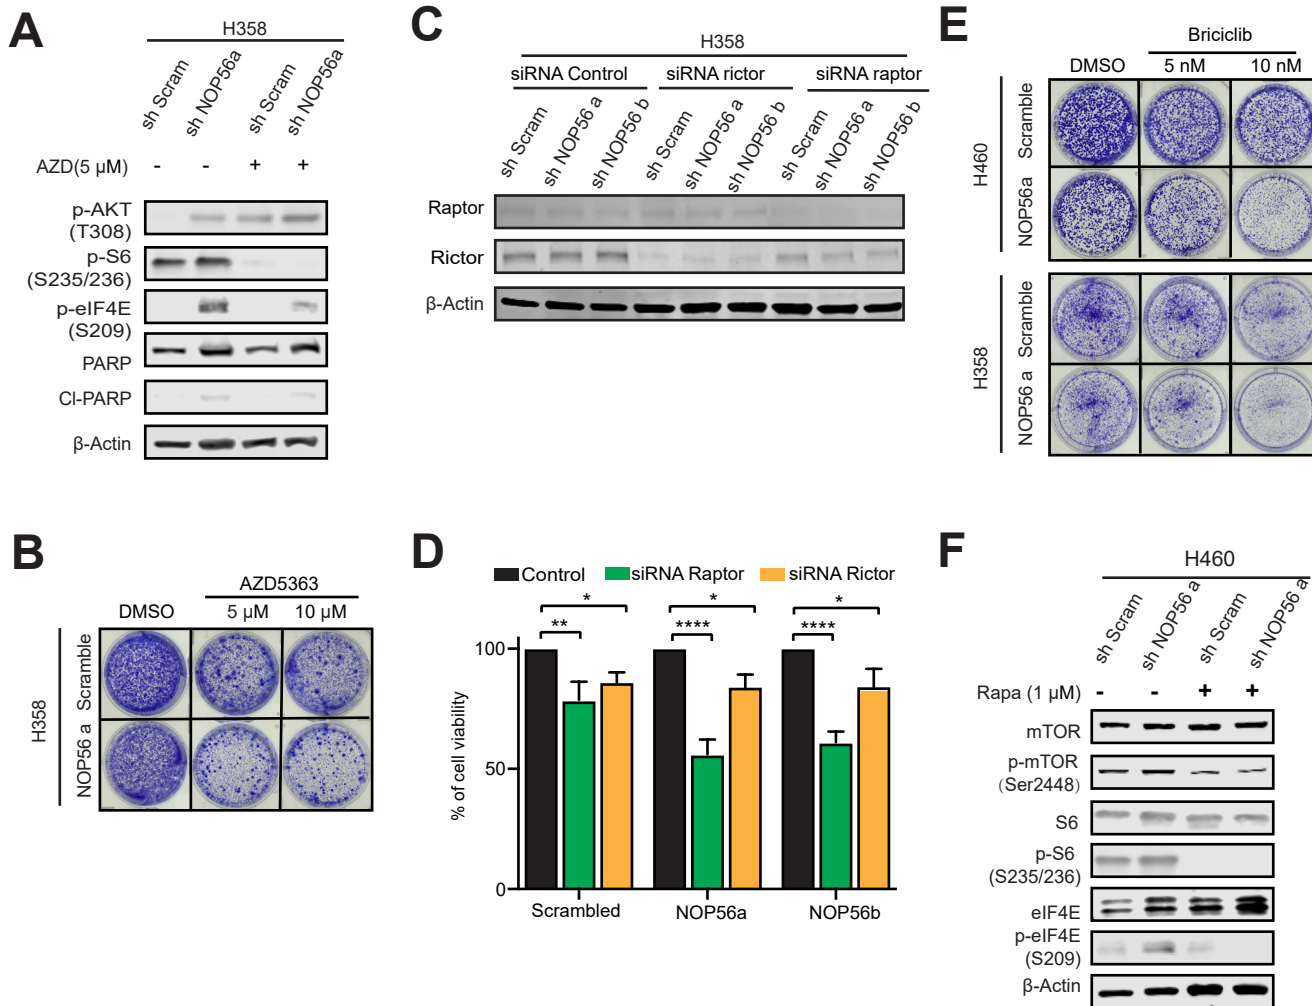

**Figure S4: NOP56 KD activates and induces dependence on the mTOR pathway in KRAS-mutant cancer cells.**

**A,** Immunoblots of H358 cells expressing control or *NOP56*-targeted shRNAs after treated with the AKT inhibitor (AZD5363) for 24 h.

**B,** Clongenic assay of H358 cells expressing control or *NOP56*-specific shRNAs after treated with indicated doses of AZD5363. Representative images are shown.

**C, D,** Immunoblots (C) and viability assay (D) of H358 cells expressing control or *NOP56*-specific shRNAs after transfected with *raptor*- or *ricTOR*-specific or control siRNAs for 72 h. Data are presented as mean  $\pm$  SD (n=3).

**E,** Clongenic assay of H358 and H460 cells expressing control shRNA or *NOP56*-specific shRNAs after treatment with indicated doses of eIF4E inhibitor (Briciclib). Representative images are shown.

**F,** Immunoblots of H460 cells expressing control or *NOP56*-target shRNAs after treated with rapamycin (1  $\mu$ M) for 24 h.

Figure S5

**A**

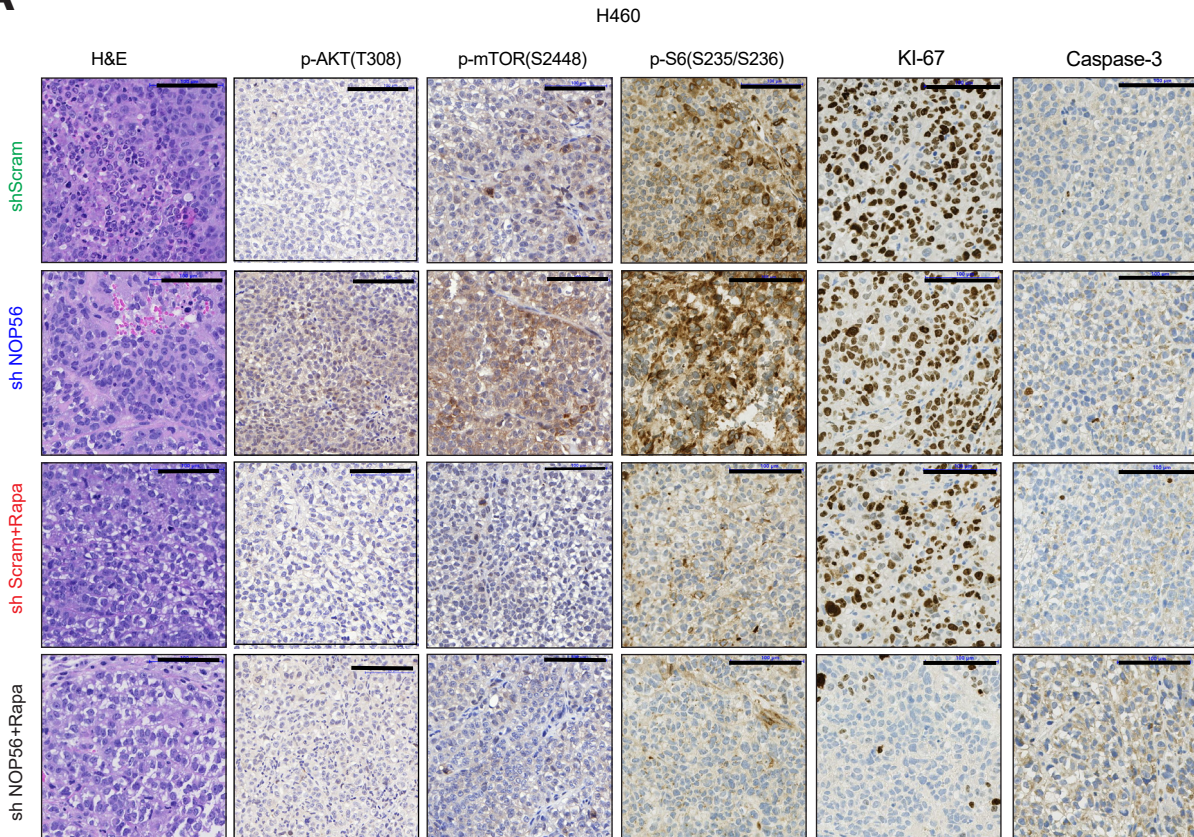

**B**

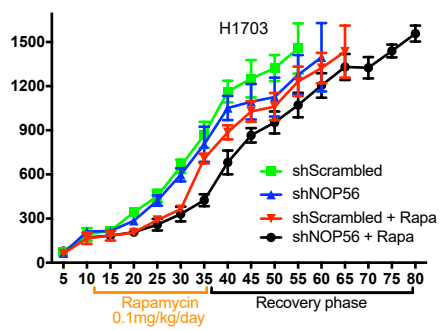

**C**

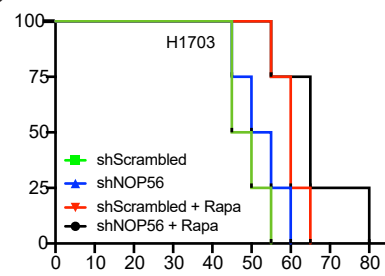

**Figure S5: *In vivo* activity and selectivity of co-targeting NOP56 and mTOR in *KRAS*-mutant lung cancer**

**A**, H&E and IHC analysis of p-AKT(T308), p-mTOR(S2448), p-S6(S235/236), Ki67 and Caspase-3) in residual H460 xenograft tumors after the indicated treatment. Scale bars 100  $\mu$ m

**B**, Tumor volume of H1703 xenografts in immunocompromised (NSG) mice. H1703 cells were transduced with either a control or an shRNA against NOP56 (shNOP56a). Tumors were measured every 5 days with a caliper.

**C**, Kaplan-Meier survival curve of mice harboring H1703 xenografts from the experiment shown in B
